# Supplementary material for: A quasi-solid composite electrolyte with dual salts for dendrite-free lithium metal batteries
Source: Royal Society of Chemistry journal article supplement (doi:10.1039/c9nj04897a), 2019-12-30
Supplement: c9nj04897a1.pdf [file c9nj04897a1.pdf]

Supporting Information

## **A quasi-solid composite electrolyte with dual salts for dendrite - free lithium metal batteries**

Genrui Qiu,<sup>a,b</sup> Chunwen Sun<sup>a,b,\*</sup>

<sup>a</sup> CAS Center for Excellence in Nanoscience, Beijing Institute of Nanoenergy and Nanosystems, Chinese Academy of Sciences, Beijing 100083, P. R. China.

<sup>b</sup> School of Nanoscience and Technology, University of Chinese Academy of Sciences, Beijing 100049, P. R. China.

\* Corresponding author.

Tel.: +86-10-82854648, fax: +86-10-82854648. Email: [sunchunwen@binn.cas.cn](mailto:sunchunwen@binn.cas.cn) (C. Sun)

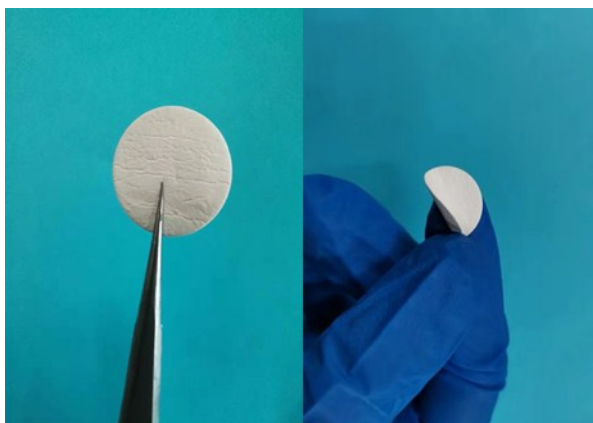

**Fig. S1** Photos of the prepared electrolyte membrane with 30wt%  $\text{Mg}(\text{ClO}_4)_2$ .

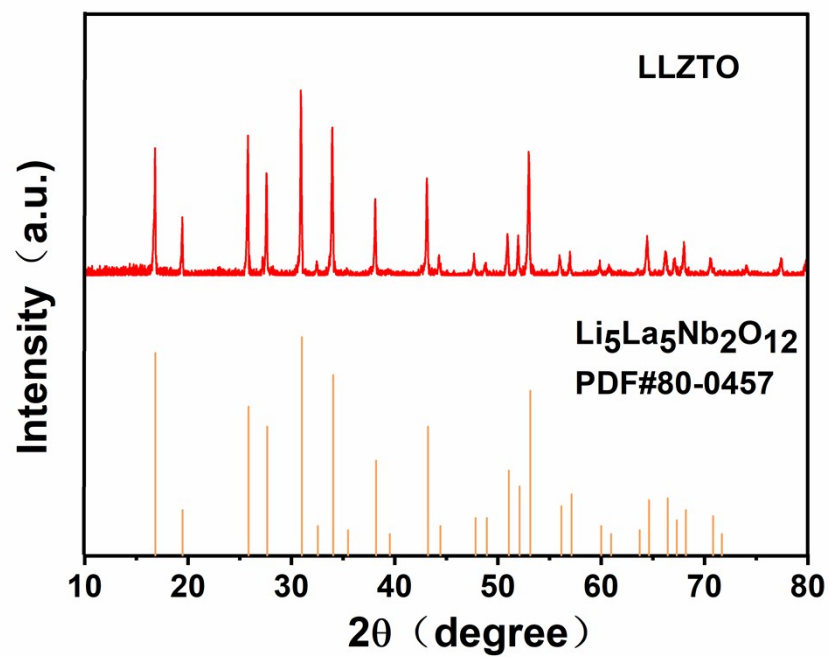

Fig. S2 XRD pattern of the as-prepared LLZTO powders.

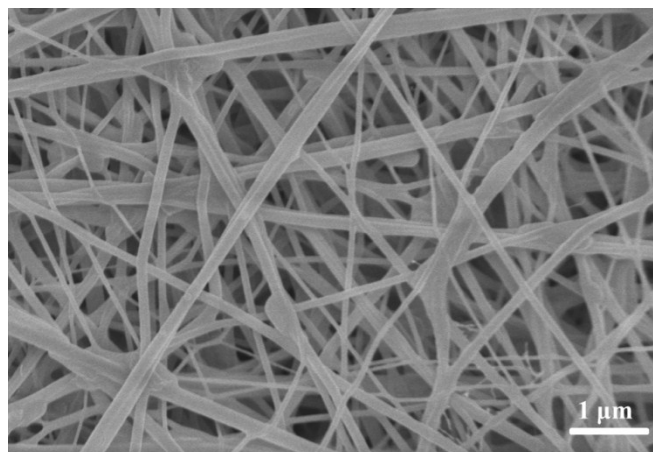

**Fig. S3** SEM image of the surface of the electrolyte membrane.

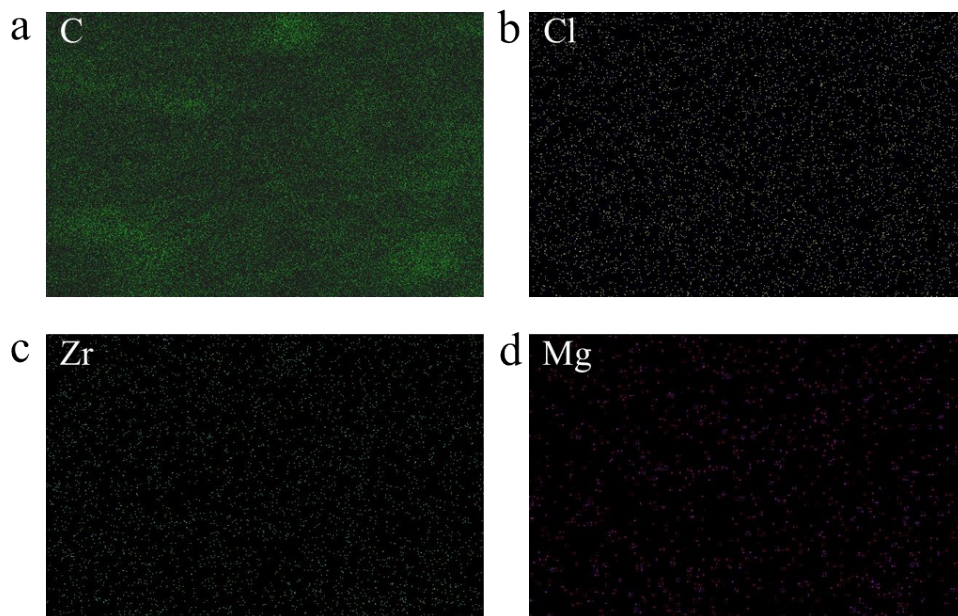

**Fig. S4** EDS elemental mappings of the electrolyte membrane. (a) C, (b) Cl, (c) Zr, and (d) Mg.

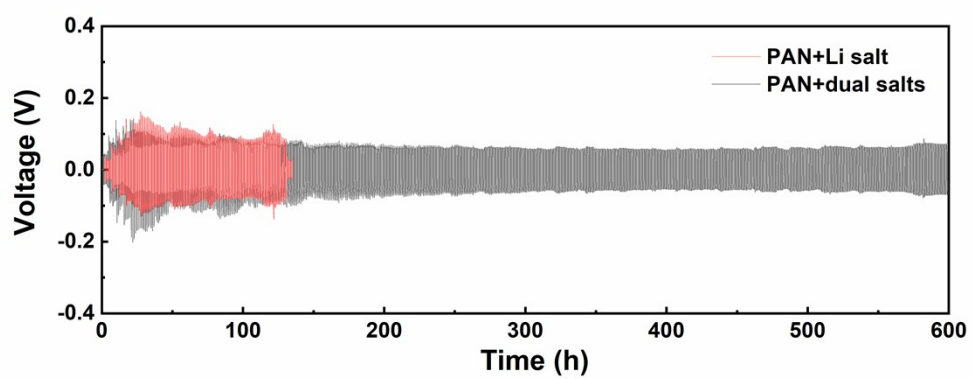

**Fig. S5** Voltage profile of the lithium plating/stripping cycling in the symmetrical Li|HSE|Li cells with magnesium salt added electrolyte and electrolyte without magnesium salt.

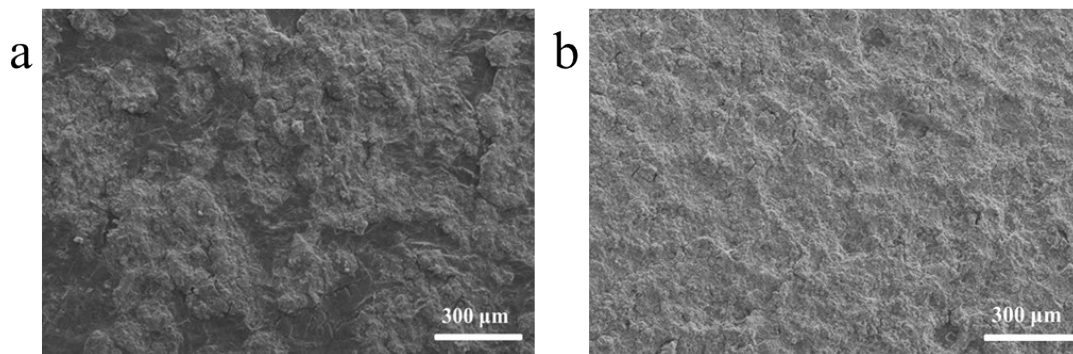

**Fig. S6** (a) SEM image of the surface of metal lithium electrode in  $\text{LiFePO}_4|\text{HSE}|\text{Li}$  cells without magnesium salt added electrolyte after 200 cycles. (b) SEM image of the surface of metal lithium electrode in  $\text{LiFePO}_4|\text{HSE}|\text{Li}$  cells with magnesium salt added electrolyte after 200 cycles.

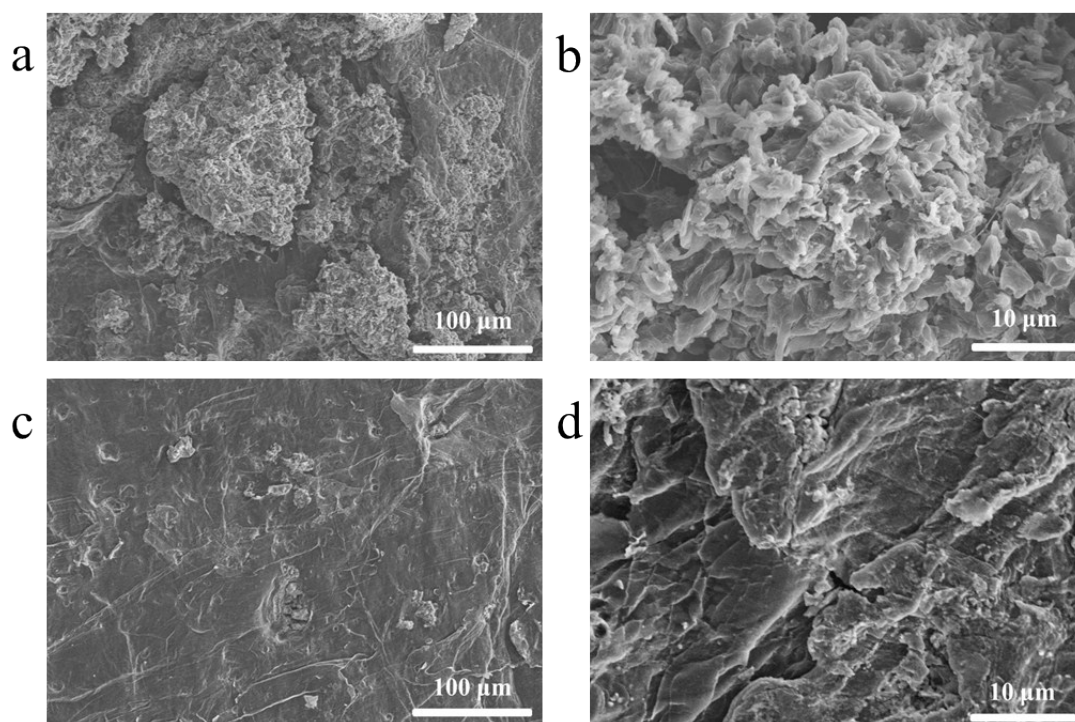

**Fig. S7** (a,b) SEM image of the surface of metal lithium electrode in Li|HSE|Li cells without magnesium salt added electrolyte after tested at different current densities from 0.045~0.36 mA cm<sup>-2</sup> for 400 h. (c,d) SEM image of the surface of metal lithium electrode in Li|HSE|Li cells with magnesium salt added electrolyte after tested at different current densities from 0.045~0.36 mA cm<sup>-2</sup> for 400 h.

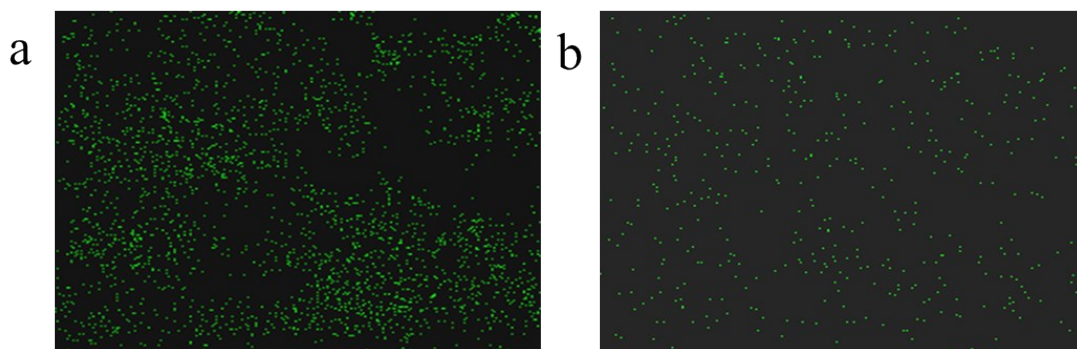

**Fig. S8** EDS elemental mappings of the Li electrode of the cell with the magnesium salt added electrolyte. (a) F, and (b) Mg.



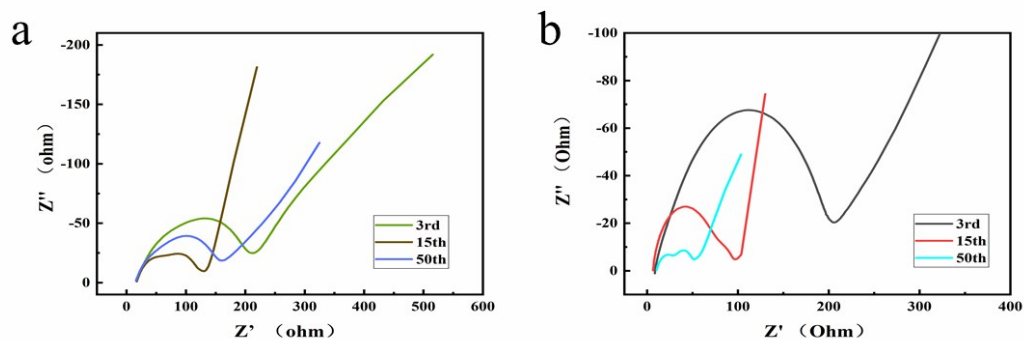

**Figure S9.** Nyquist impedance spectra of the cells after different cycles : (a) without magnesium salt added electrolyte and (b) with magnesium salt electrolyte.
